# Supplementary figures and images for: Constructing a Dynamic Monitoring and Analysis Platform for the International Mainstream Media Corpus on China’s Image
Source: Preprints.org preprint supplement (doi:10.20944/preprints202410.1364.v1), 2024-10-17

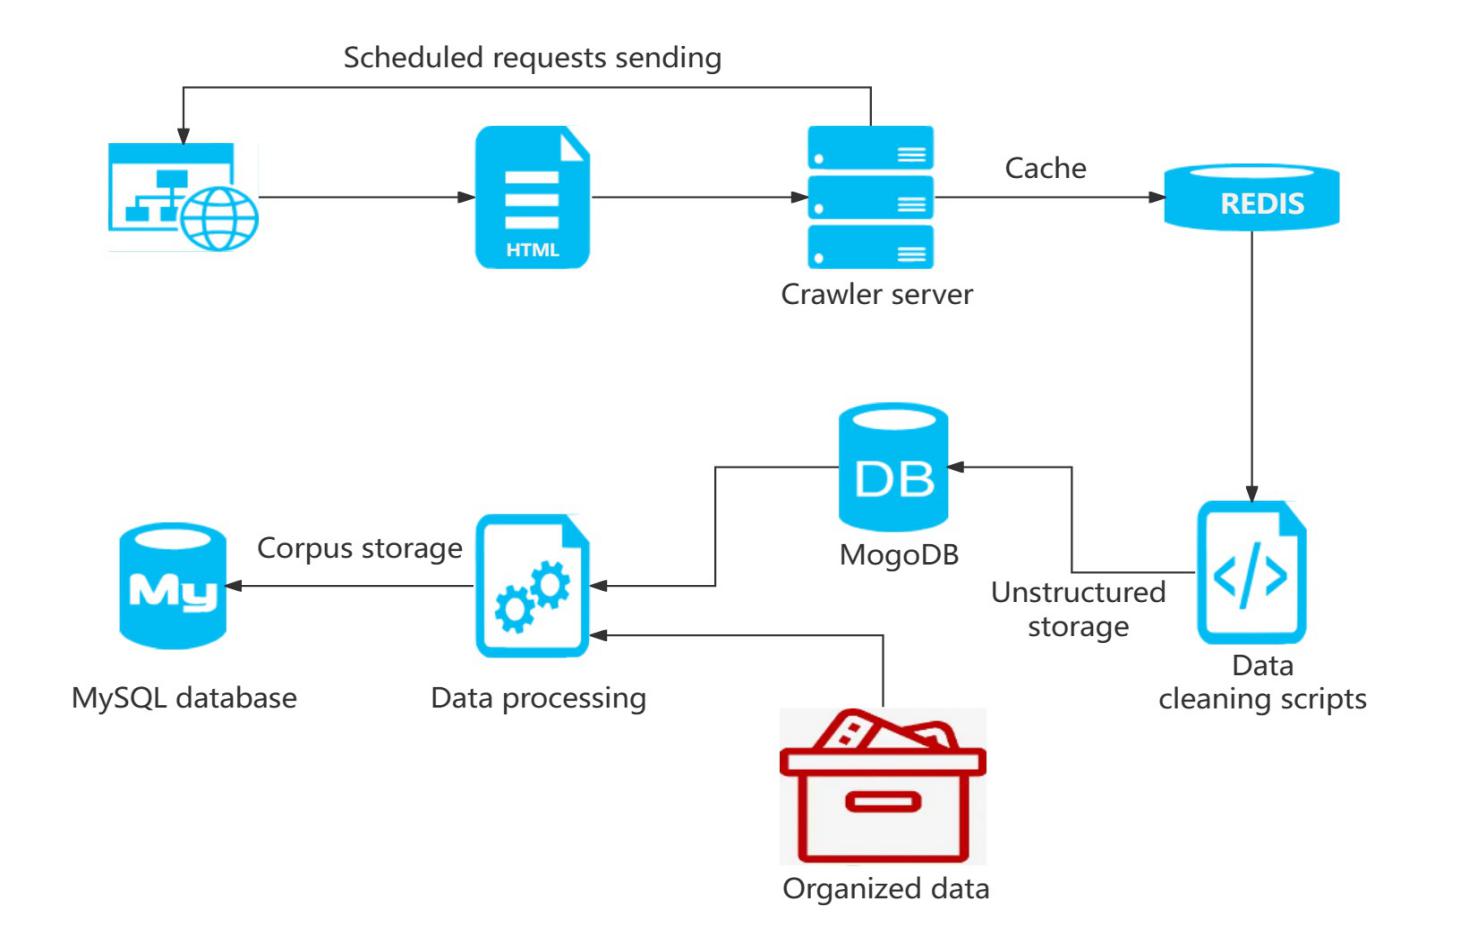
 Figure 8. Corpus data processing flow

Supplement: Supplementary file 1 [file supplementary]
